# Supplementary material for: mRNA-seq whole transcriptome profiling of fresh frozen versus archived fixed tissues
Source: PubMed Central journal article supplement (PMC5977534; doi:10.1186/s12864-018-4761-3), 2018-05-30
Supplement: 12864_2018_4761_MOESM1_ESM.pdf [file 12864_2018_4761_MOESM1_ESM.pdf]

**Table S1:** RNA integrity number for all samples

| <b>Tumor</b> | <b>Frozen sample</b> | <b>FFPE sample</b>     |
|--------------|----------------------|------------------------|
| <b>T1</b>    | 7.0                  | Bellow detection limit |
| <b>T2</b>    | 6.7                  | 1.8                    |
| <b>T3</b>    | 7.4                  | Bellow detection limit |
