# Supplementary material for: mRNA-seq whole transcriptome profiling of fresh frozen versus archived fixed tissues
Source: PubMed Central journal article supplement (PMC5977534; doi:10.1186/s12864-018-4761-3), 2018-05-30
Supplement: 12864_2018_4761_MOESM2_ESM.pdf [file 12864_2018_4761_MOESM2_ESM.pdf]

| <b>mean # reads</b>   | <b>mRNA-seq</b> |             |                 | <b>RiboZero</b> |             | <b>Nugen</b> |             |
|-----------------------|-----------------|-------------|-----------------|-----------------|-------------|--------------|-------------|
|                       | <b>FF</b>       | <b>FFPE</b> | <b>FFPE old</b> | <b>FF</b>       | <b>FFPE</b> | <b>FF</b>    | <b>FFPE</b> |
|                       | n=6             | n=5         | n=3             | n=3             | n=3         | n=3          | n=6         |
|                       |                 |             |                 |                 |             |              |             |
| <b>exons</b>          | 15,682,261      | 8,163,961   | 3,323,204       | 4,321,386       | 12,117,409  | 2,435,552    | 360,440     |
| <b>int/intergenic</b> | 6,805,218       | 7,663,591   | 4,143,807       | 9,000,027       | 90,444,840  | 7,735,736    | 3,373,633   |
