# Supplementary material for: mRNA-seq whole transcriptome profiling of fresh frozen versus archived fixed tissues
Source: PubMed Central journal article supplement (PMC5977534; doi:10.1186/s12864-018-4761-3), 2018-05-30
Supplement: 12864_2018_4761_MOESM3_ESM.pdf [file 12864_2018_4761_MOESM3_ESM.pdf]

Table S3

| Reference            | mean % mapped on exons<br>out of total # reads * |                  |                  |                    | RNA amount<br>(ug) |
|----------------------|--------------------------------------------------|------------------|------------------|--------------------|--------------------|
|                      | poly (A)<br>FF                                   | poly (A)<br>FFPE | Ribo. Dep.<br>FF | Ribo. Dep.<br>FFPE |                    |
| Our data             | 58 %                                             | 29%              | 21%              | 8%                 | 0.1 - 0.5          |
| Sinicropi et al.     |                                                  |                  |                  | 13%                | 0.1                |
| Graw et al.          | 35%                                              |                  |                  | 10%                | 0.5                |
| Hedegaard et al.     |                                                  |                  | 30%              | 12%                | 0.5                |
| Esteve-Codina et al. |                                                  |                  | 51%              | 24%                | 0.5-1              |
| Zhao et al.          | 62%                                              |                  | 31%              | 17%                | 1                  |
| Morlan et al.        | 54%                                              |                  | 22%              | 21%                | 1                  |
| Adiconis et al.      | 58%                                              |                  |                  | 22%                | 1                  |
| Li et al.            |                                                  |                  | 35%              | 24%                | 4                  |
| Beck et al.          | 22%                                              | 14%              |                  |                    | 10                 |

\*Mean percentage of exonic reads out of the total number of reads was extracted from the data provided for each study by calculating the % of exonic reads out of the uniquely mapped reads.
