# Supplementary material for: mRNA-seq whole transcriptome profiling of fresh frozen versus archived fixed tissues
Source: PubMed Central journal article supplement (PMC5977534; doi:10.1186/s12864-018-4761-3), 2018-05-30

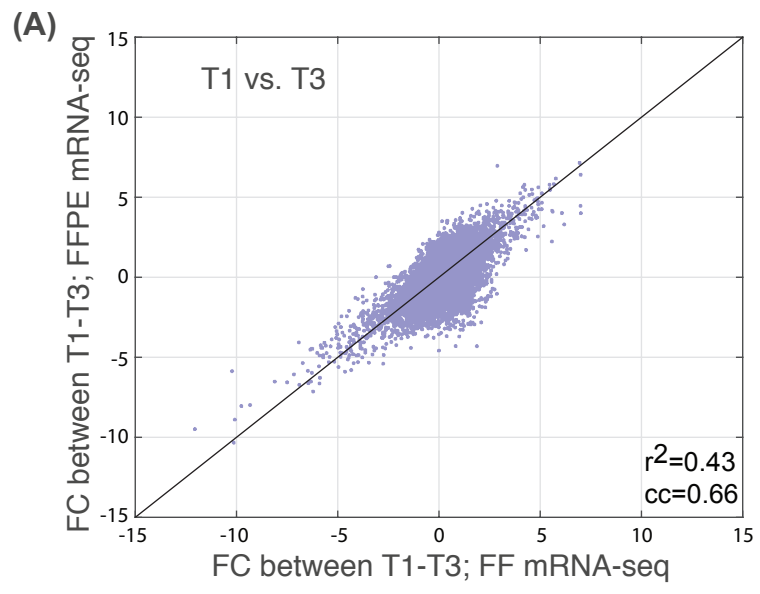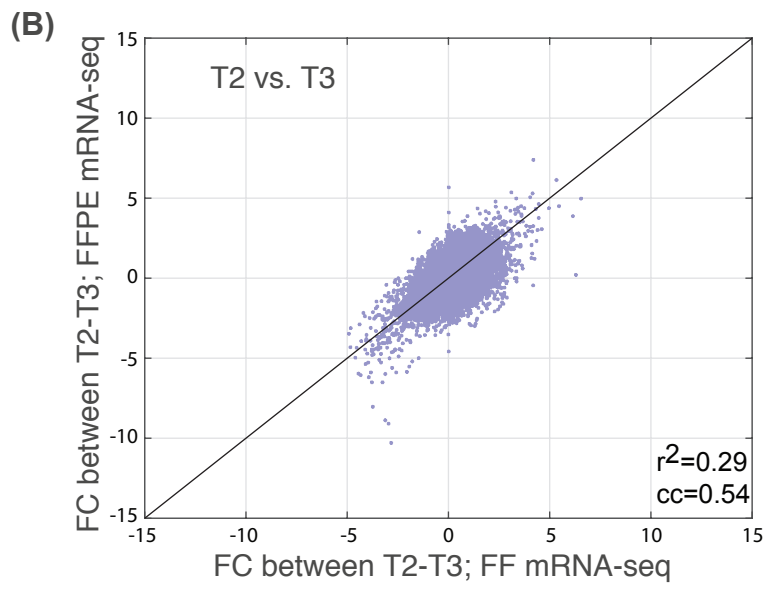

Supplement: 12864_2018_4761_MOESM5_ESM.pdf [file 12864_2018_4761_MOESM5_ESM.pdf]
